# Supplementary material
Source: MDPI journal article supplement (https://www.mdpi.com/2311-7524/8/11/1090)
Supplement: s1 [file s1]

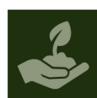

# Evaluation of the Effects of Process Conditions on the Extraction of Glucosinolates from Broccoli Sprouts

Erika Melissa Bojorquez-Rodríguez <sup>1</sup>, Daniel Guajardo-Flores <sup>1</sup>, Daniel A. Jacobo-Velázquez <sup>2,3,\*</sup> and Sergio O. Serna-Saldívar <sup>1,\*</sup>

<sup>1</sup> Escuela de Ingeniería y Ciencias, Tecnológico de Monterrey, Av. Eugenio Garza Sada 2501, Monterrey 64849, Mexico

<sup>2</sup> The Institute for Obesity Research, Tecnológico de Monterrey, Av. General Ramón Corona 2514, Zapopan 45201, Mexico

<sup>3</sup> Escuela de Ingeniería y Ciencias, Tecnológico de Monterrey, Av. General Ramón Corona 2514, Zapopan 45201, Mexico

\* Correspondence: djacobov@tec.mx (D.A.J.-V.); sserna@tec.mx (S.O.S.-S.)

**Citation:** Bojorquez-Rodríguez, E.M.; Guajardo-Flores, D.; Jacobo-Velázquez, D.A.; Serna-Saldívar, S.O. Evaluation of the Effects of Process Conditions on the Extraction of Glucosinolates from Broccoli Sprouts. *Horticulturae* **2022**, *8*, 1090. <https://doi.org/10.3390/horticulturae8111090>

Academic Editor: Marija Banožić and Stela Jokić

Received: 6 November 2022

Accepted: 16 November 2022

Published: 18 November 2022

**Publisher's Note:** MDPI stays neutral with regard to jurisdictional claims in published maps and institutional affiliations.

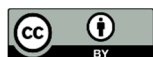

**Copyright:** © 2022 by the authors. Submitted for possible open access publication under the terms and conditions of the Creative Commons Attribution (CC BY) license (<https://creativecommons.org/licenses/by/4.0/>).

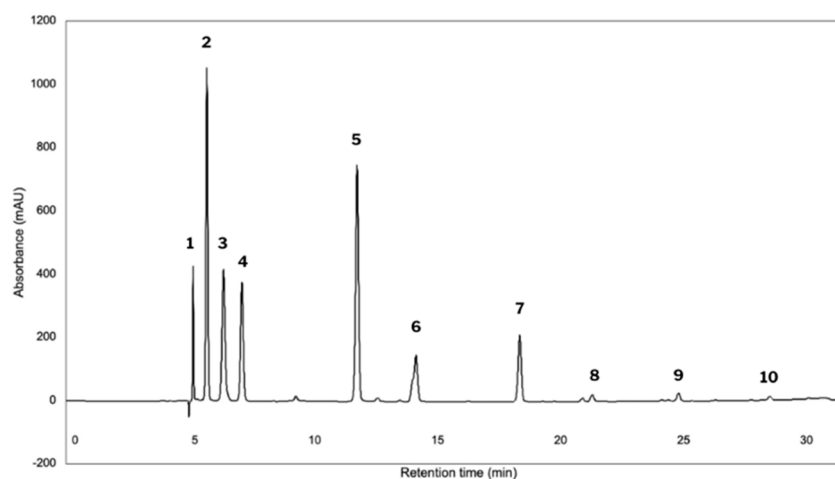

| Peak number | Retention time (min) | $\lambda_{\text{max}}$ (nm) | Compound                      |
|-------------|----------------------|-----------------------------|-------------------------------|
| 1           | 5.2                  | 227                         | Glucobrassicin-dsg            |
| 2           | 6.0                  | 232                         | Progoitrin-dsg                |
| 3           | 6.8                  | 218                         | Glucoraphanin-dsg             |
| 4           | 7.5                  | 232                         | 1-hydroxy-3-indolylmethyl-dsg |
| 5           | 12.2                 | 229                         | 4-hydroxy-glucobrassicin-dsg  |
| 6           | 14.5                 | 222, 267                    | Glucobrassicinapin-dsg        |
| 7           | 18.8                 | 210, 225                    | Glucobrassicin-dsg            |
| 8           | 21.7                 | 220, 229                    | Glucobrassicin-dsg            |
| 9           | 25.2                 | 221, 230                    | 4-methoxy-glucobrassicin-dsg  |
| 10          | 28.9                 | 230, 272                    | Neoglucobrassicin-dsg         |

**Figure S1.** Typical HPLC-DAD chromatograms (shown at 227 nm) of identified desulfoglucosinolates (dsg) from broccoli sprout extracted with 40°C, 1:35 (*w/v*) and 50% ethanol. Peak assignment: Glucobrassicin-dsg (1); Progoitrin-dsg (2); Glucoraphanin-dsg (3); 1-hydroxy-3-indolylmethyl-dsg (4); 4-hydroxy-glucobrassicin-dsg (5); Glucobrassicinapin-dsg (6); Glucobrassicin-dsg (7); Glucobrassicin-dsg (8); 4-methoxy-glucobrassicin-dsg (9); Neoglucobrassicin-dsg (10).
